# Supplementary material for: lncRNA PRR34-AS1 promotes HCC development via modulating Wnt/β-catenin pathway by absorbing miR-296-5p and upregulating E2F2 and SOX12
Source: PubMed Central journal article supplement — Mol Ther Nucleic Acids. 2021 Apr 24;25:37–52. doi: 10.1016/j.omtn.2021.04.016 (PMC8190132; doi:10.1016/j.omtn.2021.04.016), 2021-04-24
Supplement: mmc1.pdf [file mmc1.pdf]

**Supplemental information**

**lncRNA PRR34-AS1 promotes HCC development via modulating Wnt/ $\beta$ -catenin pathway by absorbing miR-296-5p and upregulating E2F2 and SOX12**

**Minzhen Qin, Yiliang Meng, Chunying Luo, Shougao He, Fengxue Qin, Yixia Yin, Junling Huang, Hailiang Zhao, Jing Hu, Zhihua Deng, Yiyang Qiu, Gaoyu Hu, Hanhe Pan, Zongshuai Qin, Zansong Huang, and Tingzhuang Yi**

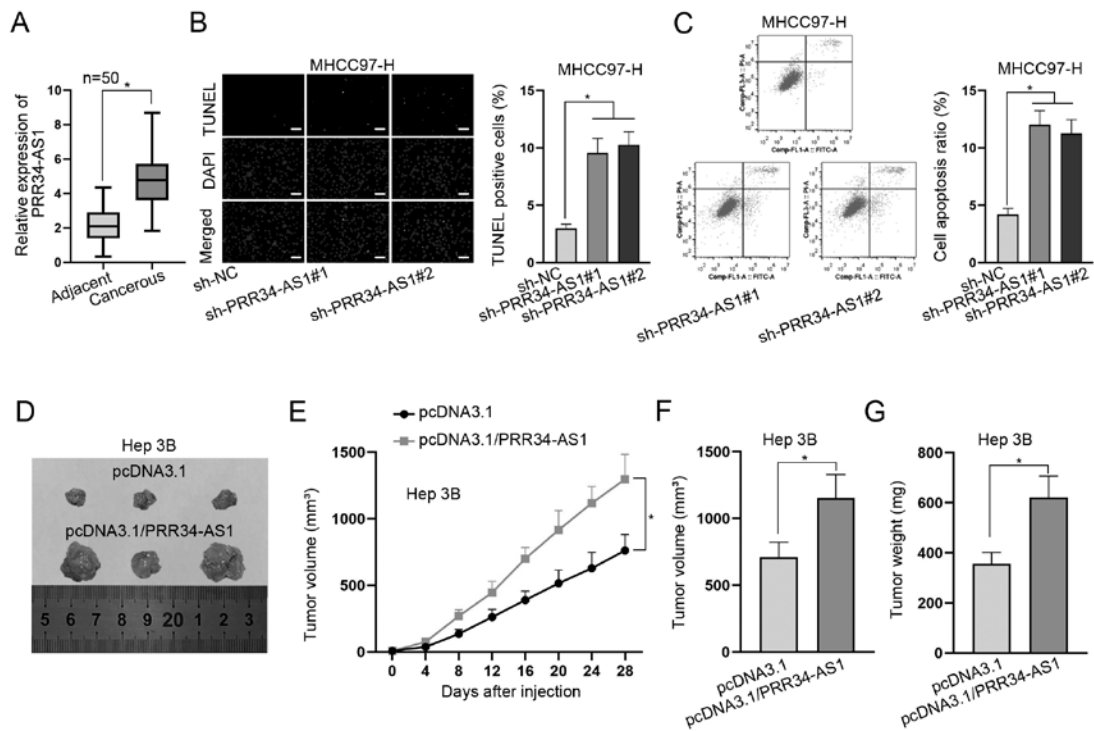

**Figure S1 PRR34-AS1 promotes HCC cells biological behaviors and growth**

A. RT-qPCR determined PRR34-AS1 expression in 50 HCC samples and paired non-cancerous samples. B-C. The apoptosis rate of PRR34-AS1-silenced MHCC97-H cells was measured via TUNEL assays and flow cytometry analysis. D. Representative images of xenografts originated from Hep 3B cells with or without PRR34-AS1 overexpression. E-G. Tumor growth curves, tumor volume and weight recorded in above two groups. \*P<0.05.

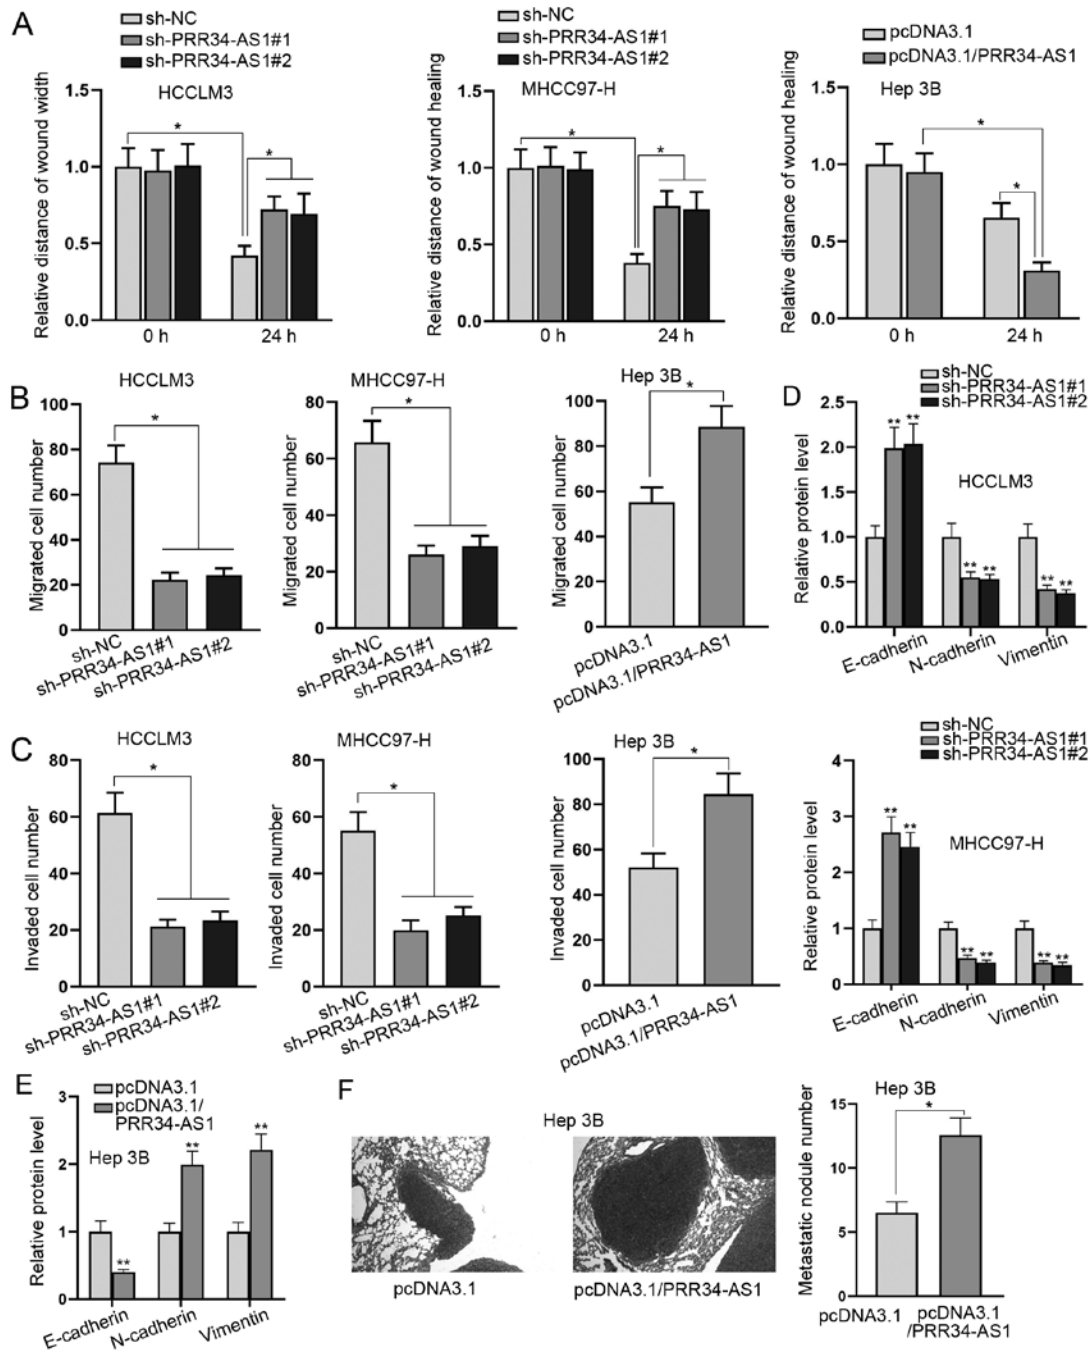

**Figure S2 PRR34-AS1 facilitates cell migration, invasion and EMT process *in vitro* and metastasis *in vivo* in HCC**

A. Quantification of wound gaps monitored in wound healing assays which were conducted in HCC cells upon PRR34-AS1 silencing or up-regulation. B-C. Quantification of migrated or invaded cell number was made based on the images from Transwell experiments in HCC cells upon PRR34-AS1 silencing or

up-regulation. D-E. Quantification of protein bands was made in the western blot assay of Figure 3D. F. HE staining evaluated the metastatic ability of Hep 3B cells upon PRR34-AS1 overexpression. \*P<0.05, \*\*P<0.01

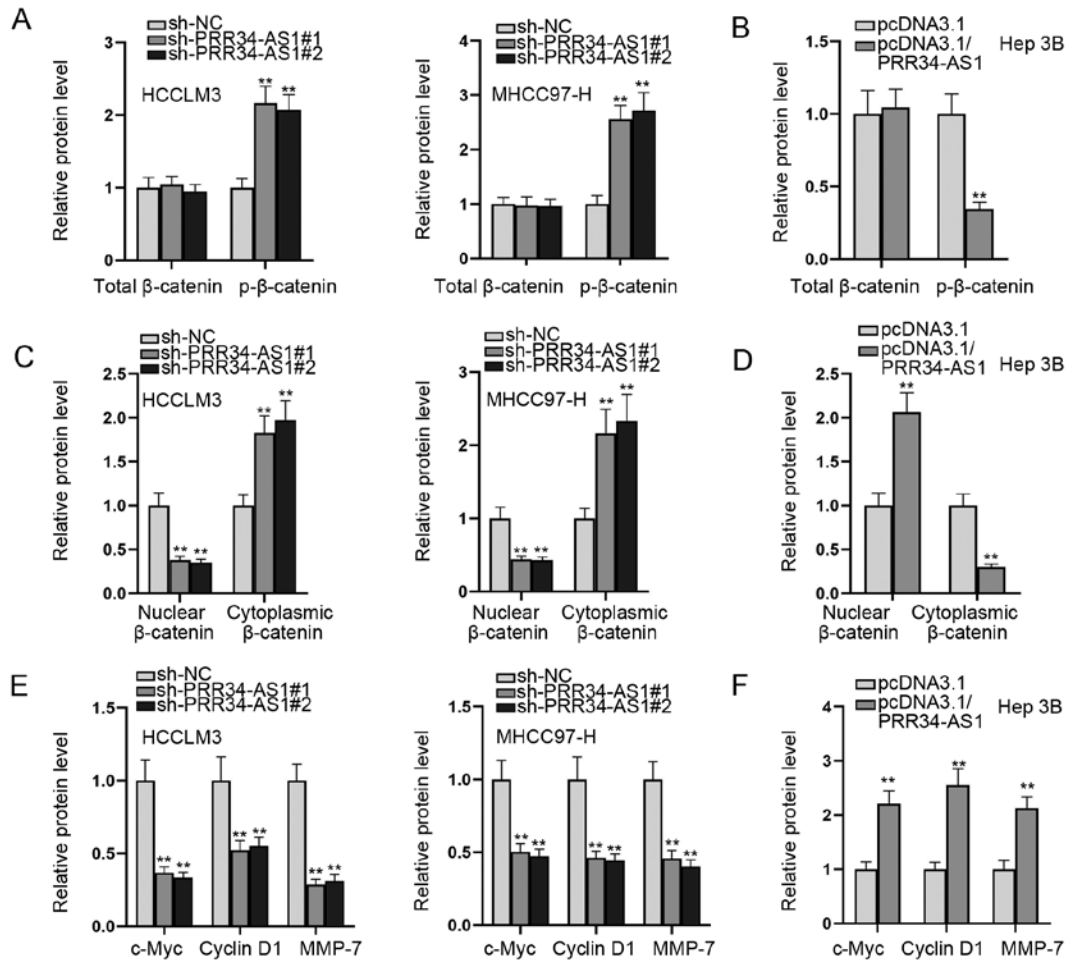

**Figure S3 PRR34-AS1 positively regulates the Wnt/β-catenin pathway.**

A-B. Quantification of protein bands was made in the western blot assay of Figure 3G.

C-D. Quantification of protein bands was made in the western blot assay of Figure 3H.

E-F. Quantification of protein bands was displayed in the western blot assay of Figure

3I. \*\* P<0.01.

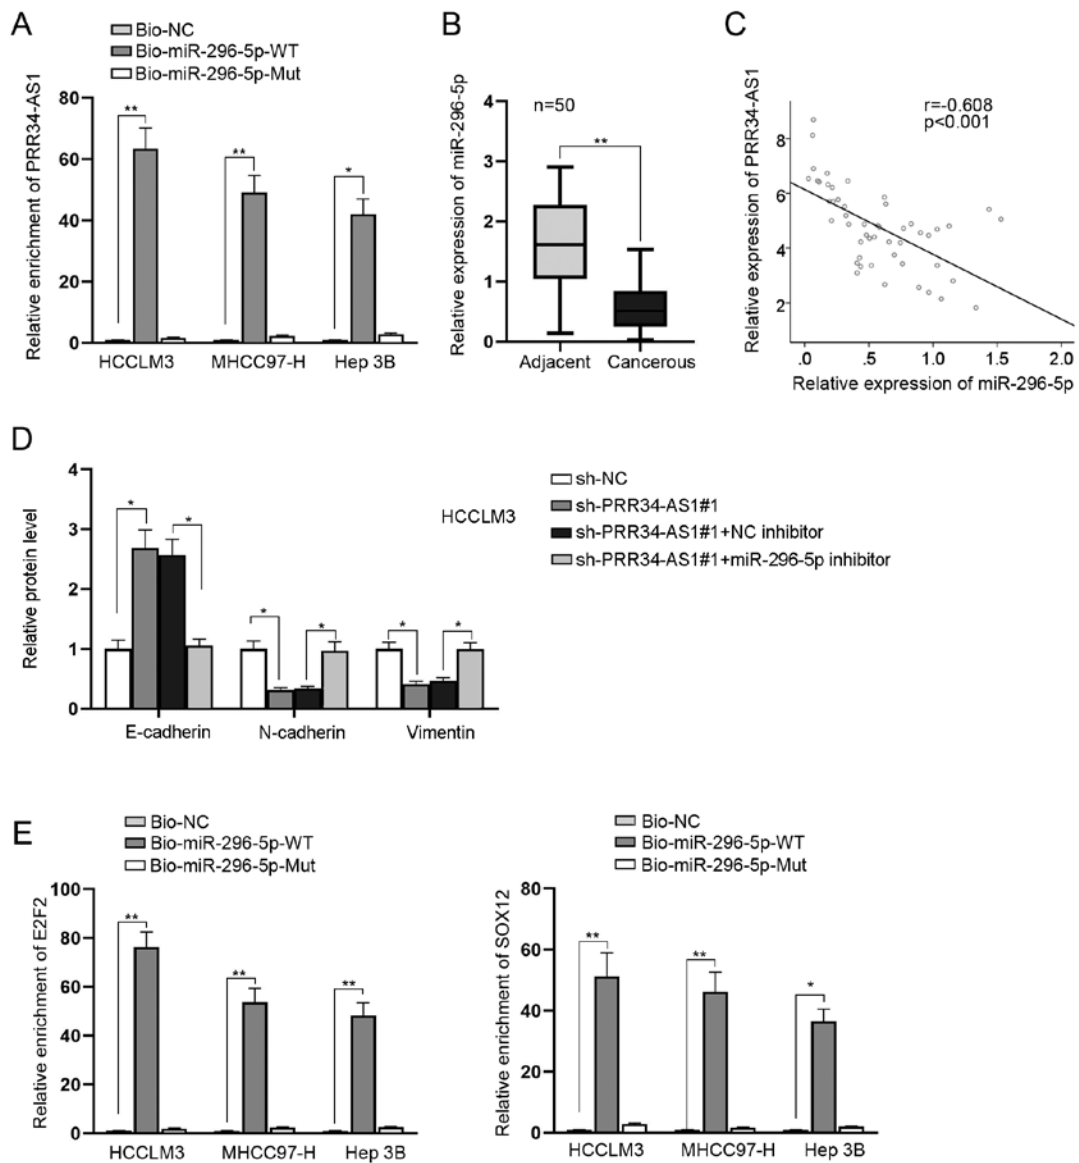

**Figure S4 PRR34-AS1 interacts with miR-296-5p to affect E2F2 and SOX12 in HCC cells.**

A. RNA pull down experiments examined the enrichments of PRR34-AS1 in Bio-miR-296-5p-WT/Mut groups in HCC cells. B. The expression of miR-296-5p in 50 pairs of clinical samples was tested by RT-qPCR. C. Pearson’s correlation analysis determined the relationship between PRR34-AS1 and miR-296-5p in 50 HCC tissues. D. Quantification of protein bands in the western blot assay of Figure 5I. E. RNA pull

down assays confirmed the enrichments of E2F2/SOX12 in Bio-miR-296-5p-WT/Mut groups in HCC cells. \*P<0.05, \*\*P<0.01.

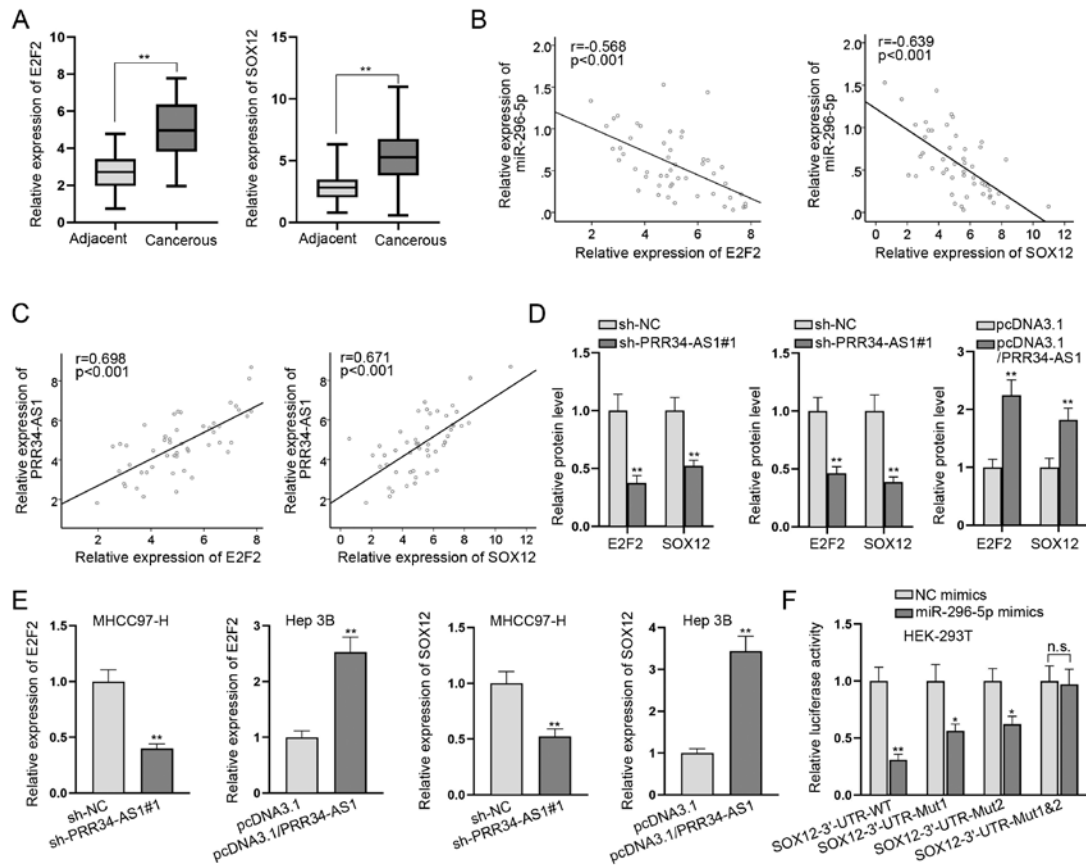

**Figure S5 PRR34-AS1 positively modulates E2F2 and SOX12 via sponging miR-296-5p.**

A. The expression of E2F2 and SOX12 in 50 pairs of clinical samples was tested by RT-qPCR. B. Pearson's correlation analysis determined the relationship between E2F2/SOX12 and miR-296-5p in 50 HCC tissues. C. Pearson's correlation analysis determined the relationship between E2F2/SOX12 and PRR34-AS1 in 50 HCC tissues. D. Quantification of protein bands in the western blot assay of Figure 6E. E. The impacts of PRR34-AS1 overexpression or silencing on the levels of E2F2 or SOX12 were assessed by RT-qPCR. F. Luciferase reporter experiments examined the binding ability between miR-296-5p and indicated SOX12 3'UTR sequences in HEK-293T cells. \*  $P < 0.05$ , \*\*  $P < 0.01$ , n.s.: no significance.



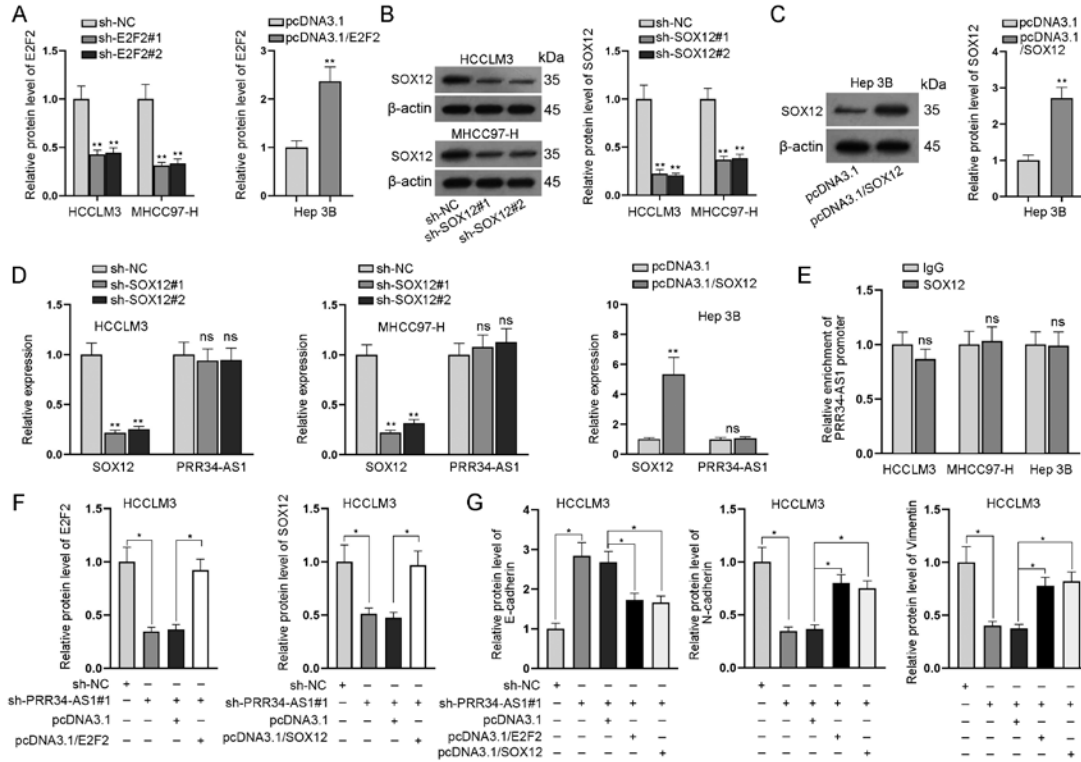

**Figure S6 E2F2 regulates PRR34-AS1 in HCC cells**

A. Quantification of protein bands in the western blot assay of Figure 7A. B-C. Western blot analysis examined the knockdown or overexpression efficiency of SOX12 in HCC cells, as well as the quantification bar graphs. D. RT-qPCR analyzed the expression levels of SOX12 and PRR34-AS1 in HCC cells after SOX12 was down-regulated or up-regulated. E. The binding capacity between PRR34-AS1 promoter and SOX12 was determined via ChIP assay. F. Quantification of protein bands in the western blot assay of Figure 8B. G. Quantification of protein bands in the western blot assay of Figure 8J. \*P<0.05, \*\*P<0.01, n.s.: no significance.

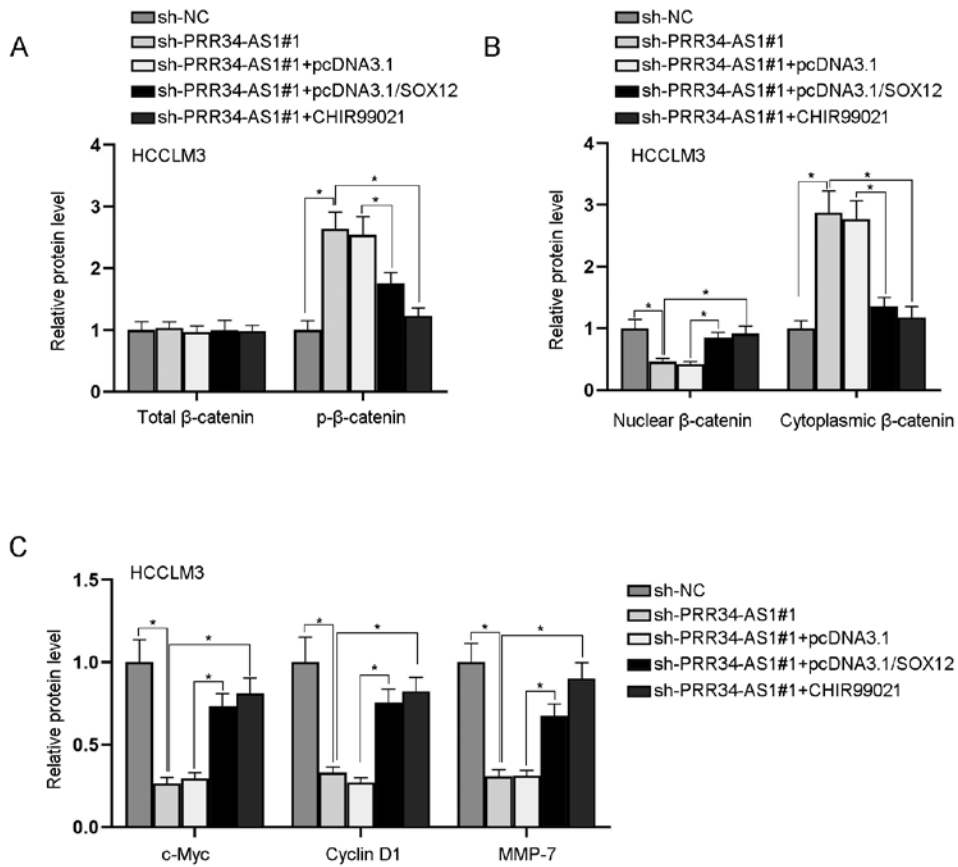

**Figure S7 PRR34-AS1 relies on SOX12 to activate Wnt/ $\beta$ -catenin pathway**

A. Quantification of protein bands in the western blot assay of Figure 9B. B. Quantification of protein bands in the western blot assay of Figure 9C. C. Quantification of protein bands in the western blot assay of Figure 9D. \* $P < 0.05$ .

## Supplementary Table 1 Sequences of transfection plasmids.

| Plasmids              | Sequences (5' > 3')                                                                                                                                                                                                                                                                                                                                                                                                                                                                                                                                                                                                                                                                                                                                                                                                                                                                                                                                                                                                                                                                                                                                                                                                                                                                                                                                                                                                                                                                                                                                                                                                                                                                                                                                                              |
|-----------------------|----------------------------------------------------------------------------------------------------------------------------------------------------------------------------------------------------------------------------------------------------------------------------------------------------------------------------------------------------------------------------------------------------------------------------------------------------------------------------------------------------------------------------------------------------------------------------------------------------------------------------------------------------------------------------------------------------------------------------------------------------------------------------------------------------------------------------------------------------------------------------------------------------------------------------------------------------------------------------------------------------------------------------------------------------------------------------------------------------------------------------------------------------------------------------------------------------------------------------------------------------------------------------------------------------------------------------------------------------------------------------------------------------------------------------------------------------------------------------------------------------------------------------------------------------------------------------------------------------------------------------------------------------------------------------------------------------------------------------------------------------------------------------------|
| sh-NC (for PRR34-AS1) | CCGGAGTAGCTGAATGACTAGCCACCTCGAGGTGGCTAGTCATTAGCTACTTTTTTG                                                                                                                                                                                                                                                                                                                                                                                                                                                                                                                                                                                                                                                                                                                                                                                                                                                                                                                                                                                                                                                                                                                                                                                                                                                                                                                                                                                                                                                                                                                                                                                                                                                                                                                        |
| sh-PRR34-AS1#1        | CCGGTAAGTTAACGCCAAATCGCGGCTCGAGCCGCGATTGGCGTTAACTTATTTTTG                                                                                                                                                                                                                                                                                                                                                                                                                                                                                                                                                                                                                                                                                                                                                                                                                                                                                                                                                                                                                                                                                                                                                                                                                                                                                                                                                                                                                                                                                                                                                                                                                                                                                                                        |
| sh-PRR34-AS1#2        | CCGGAGATGAATAAATGAAGACATCTCGAGATGTCTTCAATTTATTCATCTTTTTG                                                                                                                                                                                                                                                                                                                                                                                                                                                                                                                                                                                                                                                                                                                                                                                                                                                                                                                                                                                                                                                                                                                                                                                                                                                                                                                                                                                                                                                                                                                                                                                                                                                                                                                         |
| sh-PRR34-AS1#3        | CCGGAAGAATCGTTCTTTAAAAGTGCTCGAGCACTTTTAAAGAACGATTCTTTTTTTG                                                                                                                                                                                                                                                                                                                                                                                                                                                                                                                                                                                                                                                                                                                                                                                                                                                                                                                                                                                                                                                                                                                                                                                                                                                                                                                                                                                                                                                                                                                                                                                                                                                                                                                       |
| sh-NC (for E2F2)      | CCGGTATGCGTGCTGTGCATCTACTCTCGAGAGTAGATGCACAGCACGCATATTTTTG                                                                                                                                                                                                                                                                                                                                                                                                                                                                                                                                                                                                                                                                                                                                                                                                                                                                                                                                                                                                                                                                                                                                                                                                                                                                                                                                                                                                                                                                                                                                                                                                                                                                                                                       |
| sh-E2F2#1             | CCGGTCCGTGCTGTGGCAACTTTACTCGAGTAAAGTTGCCAACAGCAGGATTTTTG                                                                                                                                                                                                                                                                                                                                                                                                                                                                                                                                                                                                                                                                                                                                                                                                                                                                                                                                                                                                                                                                                                                                                                                                                                                                                                                                                                                                                                                                                                                                                                                                                                                                                                                         |
| sh-E2F2#2             | CCGGCCACTCTATAAGCAGGGCTAACTCGAGTTAGCCCTGCTTATAGAGTGGTTTTTG                                                                                                                                                                                                                                                                                                                                                                                                                                                                                                                                                                                                                                                                                                                                                                                                                                                                                                                                                                                                                                                                                                                                                                                                                                                                                                                                                                                                                                                                                                                                                                                                                                                                                                                       |
| sh-NC (for SOX12)     | CCGGGGCAGCACAGGCGGAGAGATACTCGAGTATCTCTCCGCTGTGCTGCCTTTTTG                                                                                                                                                                                                                                                                                                                                                                                                                                                                                                                                                                                                                                                                                                                                                                                                                                                                                                                                                                                                                                                                                                                                                                                                                                                                                                                                                                                                                                                                                                                                                                                                                                                                                                                        |
| sh-SOX12#1            | CCGGGCAGCACGAAACGGCGGAAGATCTCGAGATCTCCGCCGTTGCTGCTGCTTTTTG                                                                                                                                                                                                                                                                                                                                                                                                                                                                                                                                                                                                                                                                                                                                                                                                                                                                                                                                                                                                                                                                                                                                                                                                                                                                                                                                                                                                                                                                                                                                                                                                                                                                                                                       |
| sh-SOX12#2            | CCGGGCCTTTAATGAGGACTAAGAAGTCTCGAGTCTTAGTCTCATTAAAGGCTTTTTG                                                                                                                                                                                                                                                                                                                                                                                                                                                                                                                                                                                                                                                                                                                                                                                                                                                                                                                                                                                                                                                                                                                                                                                                                                                                                                                                                                                                                                                                                                                                                                                                                                                                                                                       |
| NC mimics             | GCCUCACCCGUACCGGAUCCU                                                                                                                                                                                                                                                                                                                                                                                                                                                                                                                                                                                                                                                                                                                                                                                                                                                                                                                                                                                                                                                                                                                                                                                                                                                                                                                                                                                                                                                                                                                                                                                                                                                                                                                                                            |
| miR-296-5p mimics     | AGGGCCCCCCUCAUCCUGU                                                                                                                                                                                                                                                                                                                                                                                                                                                                                                                                                                                                                                                                                                                                                                                                                                                                                                                                                                                                                                                                                                                                                                                                                                                                                                                                                                                                                                                                                                                                                                                                                                                                                                                                                              |
| NC inhibitors         | AGGCGAGGAUGGUGAGGCCU                                                                                                                                                                                                                                                                                                                                                                                                                                                                                                                                                                                                                                                                                                                                                                                                                                                                                                                                                                                                                                                                                                                                                                                                                                                                                                                                                                                                                                                                                                                                                                                                                                                                                                                                                             |
| miR-296-5p inhibitors | ACAGGAUUGAGGGGGGGCCU                                                                                                                                                                                                                                                                                                                                                                                                                                                                                                                                                                                                                                                                                                                                                                                                                                                                                                                                                                                                                                                                                                                                                                                                                                                                                                                                                                                                                                                                                                                                                                                                                                                                                                                                                             |
| pcDNA3.1/PRR34-AS1    | CCGGAGCACGGAGGACGGGGCCGGGGCAGCTGGGCACCAGCAGGACCCGAGGCCAGGA<br>GCCAGGGGCCAGAAGATTGAGCTTCTAGAGCCTCAGAGATGGAATTCGCCGTTTTGCCGC<br>GATTTGGCGTTAACTTATTGACCCATGGGGAGGAGGGTCACTTCCCCTGAAAAGAAGGCAG<br>AGATGTTTTGCTGTGCCAGTGTGAGGAAGCGAAGGAAAAGAAAGATCTTTTGAAAATGTGT<br>ACATCTACTTGCAGCTTAAAATCCAAAGTCCAGACATTTTTCTGGAGGAAATAAATGTCT<br>TCAATTTATTCATCTTACCTGTTGATTATGTTCTGTAATGATTTATTTATAATTTAATCCTGTG<br>TAGAACCGAGGCCATCTTTGAAAAGTAAAAGACCTAGGTCTCTTTGGTCCAGGAGACATTGT<br>GGCCCTCTCTAAAATCATTGACTGCCGAGATCTGGGCCAGGCGGCTCTCGGACTGAACCG<br>GTCTGTGCTAGGCAGCCTGGCCCACTCGGCCTTCAAACACAAGGGATGGGAGACATATGC<br>TCGGCTCACATCGTTTTGTTTTGATTTATTTAAACTGCTTAAGATGATTTAGCACAAAGGAGT<br>GGTGTATCTTACTTGCATCTGAGAGCCACTGGATTTGCAAGCTAGAGTACAATTTTTTTTTTA<br>ATCCAAATTTAGAAATTGCCTTTTAGAGTAGACAACAGCATGCTACTTTGCCTTTTAACTCACT<br>TTTAAAGAACGATTCTTAAGATCAAGTACATTGAATTTGGAGATTGGTCCCCCTCCGTTATTA<br>GGGGCTGGAATGGCCCACTTTTCAAATAAAGTGCAGAAAAGGGGTGTTTCTGACCTAAGA<br>GTTCTCCAGGCTGGGCTCGTACCACAGAGATCTTCCACACCCATGTCCTGAGTCTTTGTC<br>TACACACCATTTTTCTCAAGGAGAAGGAGTGTGGCATTCAAGTCCAGTGTATCGTGTGG<br>AAAAGAGTCCCTGCCTGGCTGAGAACTGTACAGCAGCCGGGCCACTTCCCAGCATGAC<br>CCACAAGCCCGATGGTGGCCCTCGAATGGTTAAGGGACCCGTACAGATACCATTCTTTTAAA<br>GCAAGCCAATGCAATCTTACGAATTGCAGTCCACCCTGGCTGGTACTAATCTAATAAA<br>TGGAAAAAATTTAAAAGATTGGGGACAACAGGAAACACATTGGATCCCCAGGGGAAACGG<br>CCTGGAAGCTACAGTAGAGACATGGGTGACCAAGGGCTCTGTTCAAGTCTGGGGCTGTT<br>CCCTTTATTCCTCAAGCCTCAGCTCCCGGATTTAAAGTGAAGACAGCACCCAGCCAGGCC<br>CACTGTCAAGGCTGTTGCAGGAATATGACAACAGCCACCAATATTTGCATAGCAGAGATGC<br>CCAGTTTCGTTTTCTATTTGAAAGTTTCTGTAAGGGGGATGTGCTAGAGACACGAGAACAA<br>CTGCTACCATCTAATAACTTTTCTGGCAATACACGACGATGATTGTTATGTTAATCTCATAA<br>CTATTAACAATAATTCATTCTCATAATGAATATATCTATTTGACTTATAATAAATAGAA<br>TCATATCAGTAAAAAAAAAAAAAAAAAAAA |
| pcDNA3.1/SOX12        | ATGGTGCAGCAGCGGGGCGGAGGGCCAAGCGGGACGGCGGGCCGCCGCCCGGGGACC<br>CGGGCCGGCCGAGGAGGGGGCGCGAGCCCGGCTGGTGAAGACCCCGAGCGGCCACA<br>TCAAGAGGCCGATGAACGCATTCATGGTGTGGTTCGAGCACGAACGGCGGAAGATCATGGA<br>CCAGTGGCCCGACATGCACAACGCCGAGATCTCCAAGCGCCTGGGCCGCCGCTGGCAGCTG<br>CTGAGGACTCGGAGAAGATCCCGTTCGTGCGGGAGGCGGAGCGGCTGCGGCTCAAGCAC<br>ATGGCGGATTACCCGACTACAAGTACCGGCCGCGCAAAAAGAGCAAGGGGGCGCCCGCC<br>AAGGCGGGCCCCCGCCCCCGTGGTAGCGGTGGCGGCAGCCGGCTCAAGCCCCGGGCC<br>GCAGTCCCTGGCCGCGGGGGCCCGAGCAGCGGGAGGGCCTTTGGGGGGCGGGGCGG<br>CGGCGCCCGAGGACGACGATGAAGACGACGACGAGGAGTGTGGAAGTGCCTGGTGC<br>AGACCCCGGGGCGGGAGCTGTGGAGGATGGTCCCGCGGGACGGGCCGCTCGGGGACAA<br>GCGGAGCGCGCCCAAGGGCCGTCGGGCGAGGGGGCGGCCGCCGCCCGCCCGCTCCCC<br>GACACCGTCCGAGGACGAGGAGCCGGAGGAAGAGGAGGAGGAGGCGGCAGCGGCTGAG<br>GAAGTGAAGAGGAGACGGTGGCGTCCGGGGAGGAGTCCGCTGGGCTTTCTGTCCAGGCTG<br>CCCCCTGGCCCGGCGGCTGGACTGCAGCGCCCTGGATCGCGACCCGGACCTGCAGCCTC<br>CCTCGGCACGTCCGACTTCCGAGTCCCGGACTACTGCACCCCGAGGTTACCGAGATGATC<br>GCGGGGACTGGCGCCGCTAGCATCGCAGACCTGGTTTTACCTACTGA                                                                                                                                                                                                                                                                                                                                                                                                                                                                                                                                                                                                                                                                                                                                                            |

**Supplementary Table 2 Sequences of primers.**

| A                                                 | B                             | C                       |
|---------------------------------------------------|-------------------------------|-------------------------|
| <b>Supplementary Table 2 Sequences of primers</b> |                               |                         |
| <b>Primers</b>                                    | <b>Sequences (5' &gt; 3')</b> | <b>Accession Number</b> |
| PRR34-AS1-forward (F)                             | CCGCGATTTGGCGTAACTT           | NR_027034.1             |
| PRR34-AS1-reverse (R)                             | TCCAAAGATGGCCTCGGTTC          |                         |
| miR-296-5p-F                                      | ATTAGAGGGCCCCCCTCAA           | MIMAT0000690            |
| miR-296-5p-R                                      | CTCAACTGGTGTGCTGGA            |                         |
| ZNF76-F                                           | CAAGACCTCAGGAGACCTGC          | NM_001292032.2          |
| ZNF76-R                                           | CCGTGCAAACGTATGGCTTC          |                         |
| HMGA1-F                                           | GCATCCGCATTTGCTACCAGC         | NM_001319077.2          |
| HMGA1-R                                           | TCCTTCTGACTCCCTACCAGC         |                         |
| FAM53B-F                                          | CGCACAGGAGTTGACCACAT          | NM_014661.4             |
| FAM53B-R                                          | GGGTGGGTATCAGCCATCTT          |                         |
| FGFR3-F                                           | ACCGACAAGGAGCTAGAGGT          | NM_000142.5             |
| FGFR3-R                                           | TGAACAGGAAGAAGCCCACC          |                         |
| E2F2-F                                            | ACTCAAGGACTAGAGAGCGAG         | NM_004091.4             |
| E2F2-R                                            | TTAGAGATCGCCGCTTGGGA          |                         |
| HIPK1-F                                           | ACAGTTGGATCCCGTACCAC          | NM_001369806.1          |
| HIPK1-R                                           | ATGCCATACTGAGGCGGAAG          |                         |
| SOX12-F                                           | CTGGAGTGGTGGGATTGGTC          | NM_006943.4             |
| SOX12-R                                           | GGGTGTCAGAGGGACAAAGG          |                         |
| CDK16-F                                           | GATGAGAGTGGTGGTGGTGG          | NM_001170460.2          |
| CDK16-R                                           | CCTCGTGCACAATCTCTGGT          |                         |
| BMF-F                                             | CCTCCTCCCAATCGAGTCTG          | NM_001003940.2          |
| BMF-R                                             | CCTCCTCCCAATCGAGTCTG          |                         |
| SLC16A3-F                                         | GTCTGAAGGGGGACAGGTGAG         | NM_001042422.3          |
| SLC16A3-R                                         | GTGATGACGAAACAGCCGAAG         |                         |
| GAPDH-F                                           | GGAGCGAGATCCCTCCAAAAT         | NM_001256799.3          |
| GAPDH-R                                           | GGCTGTTGTCATACTTCTCATGG       |                         |
| U6-F                                              | CTCGCTTCGGCAGCACA             | NR_004394.1             |
| U6-R                                              | AACGCTTCACGAATTTGCGT          |                         |
